# Supplementary material for: Analysis of a novel immune checkpoint, Siglec‐15, in pancreatic ductal adenocarcinoma
Source: PubMed Central journal article supplement — J Pathol Clin Res. 2022 Jan 27;8(3):268–78. doi: 10.1002/cjp2.260 (PMC8977273; doi:10.1002/cjp2.260), 2022-01-27
Supplement: CJP2-8-268-s001.pdf [file CJP2-8-268-s001.pdf]

# **Analysis of a novel immune checkpoint, Siglec-15, in pancreatic ductal adenocarcinoma**

X Chen *et al*, *J Pathol Clin Res*, DOI 10.1002/cjp2.260

## **Supplementary Material**

### **Supplementary materials and methods**

**Figure S1.** Representative multiplexed immunofluorescence staining of Siglec-15 positivity on macrophages in pancreatic ductal adenocarcinoma

**Figure S2.** Comparison between Siglec-15 and stromal densities of CD3+ T cells, CD4+ T cells, CD8+ T cells, FOXP3+ T cells, CD45RO+ T cells, CD15+ neutrophils, CD68+ macrophages, and TPS of PD-L1 in PDAC using t tests

**Figure S3.** Associations of TPS of Siglec-15 with CD3+ T cells, CD4+ T cells, CD8+ T cells, FOXP3+ T cells, CD45RO+ T cells, CD15+ neutrophils, and CD68+ macrophages using Spearman's correlation

**Table S1.** Association of clinicopathological features with Siglec-15 and PD-L1 expression

**Table S2.** Association of DNA damage repair molecules with Siglec-15 and PD-L1 expression

**Table S3.** Association of Siglec-15 with immune cells

## **Supplementary Materials and Methods**

### **Multiplexed immunofluorescence (mIF) staining**

mIF staining was performed based on the manufacturer's protocol (Opal Multiplex IHC Assay Kit; Akoya Biosciences, MA, USA) to visualize the co-expression of CD68 and Siglec-15. Briefly, TMAs specimens were baked at 65 °C for one hour, followed by deparaffinizing with xylene and rehydrating with a graded series of ethanol solutions ethanol. For epitope retrieval, slides were placed in a microwave with AR6 antigen retrieval buffer for 45 s at 100% power and an additional 15 min at 20% power. After blocking, slides were incubated with the first primary antibody (CD68) for one hour at 37°C, followed by incubating the sections with an anti-rabbit horseradish peroxidase-conjugated secondary antibody (Akoya Biosciences) for 10 minutes. The signal was further amplified using the Opal fluorophore working solution containing Opal 540 tyramide signal amplification reagent (Akoya Biosciences). Subsequently, citrate buffer (pH, 6.0) was used to remove the bound antibody. The same procedures were repeated for the second primary antibody [anti-Siglec-15/Opal 650]. Then DAPI were applied to counterstain the slides for 5 minutes at room temperature. At last, the slides were mounted with a hard set medium. Representative images (supplementary material, Figure S1) were acquired by the Vectra Polaris multispectral slide scanner (Akoya Biosciences).

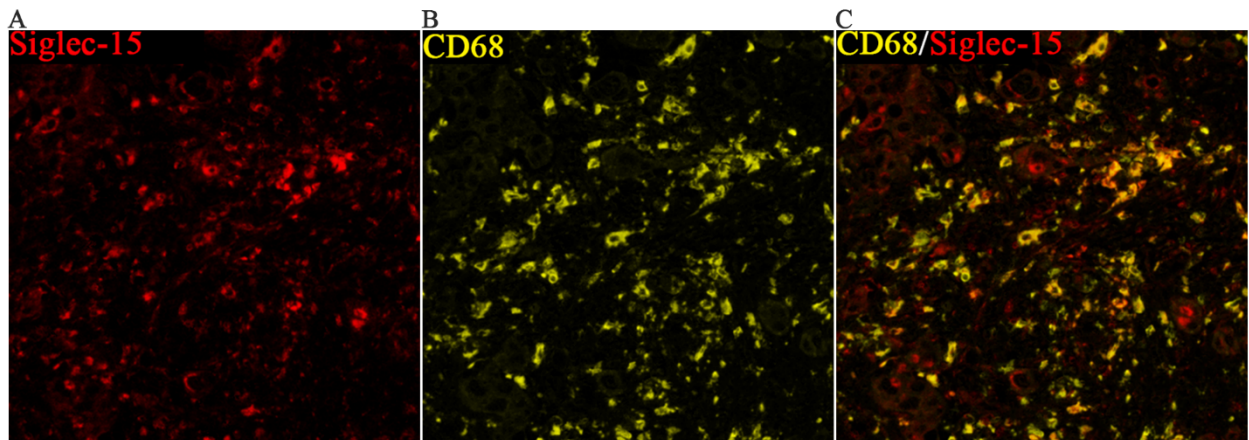

**Figure S1.** Representative multiplexed immunofluorescence staining of Siglec-15 positivity on macrophages in pancreatic ductal adenocarcinoma. (200 $\times$ )

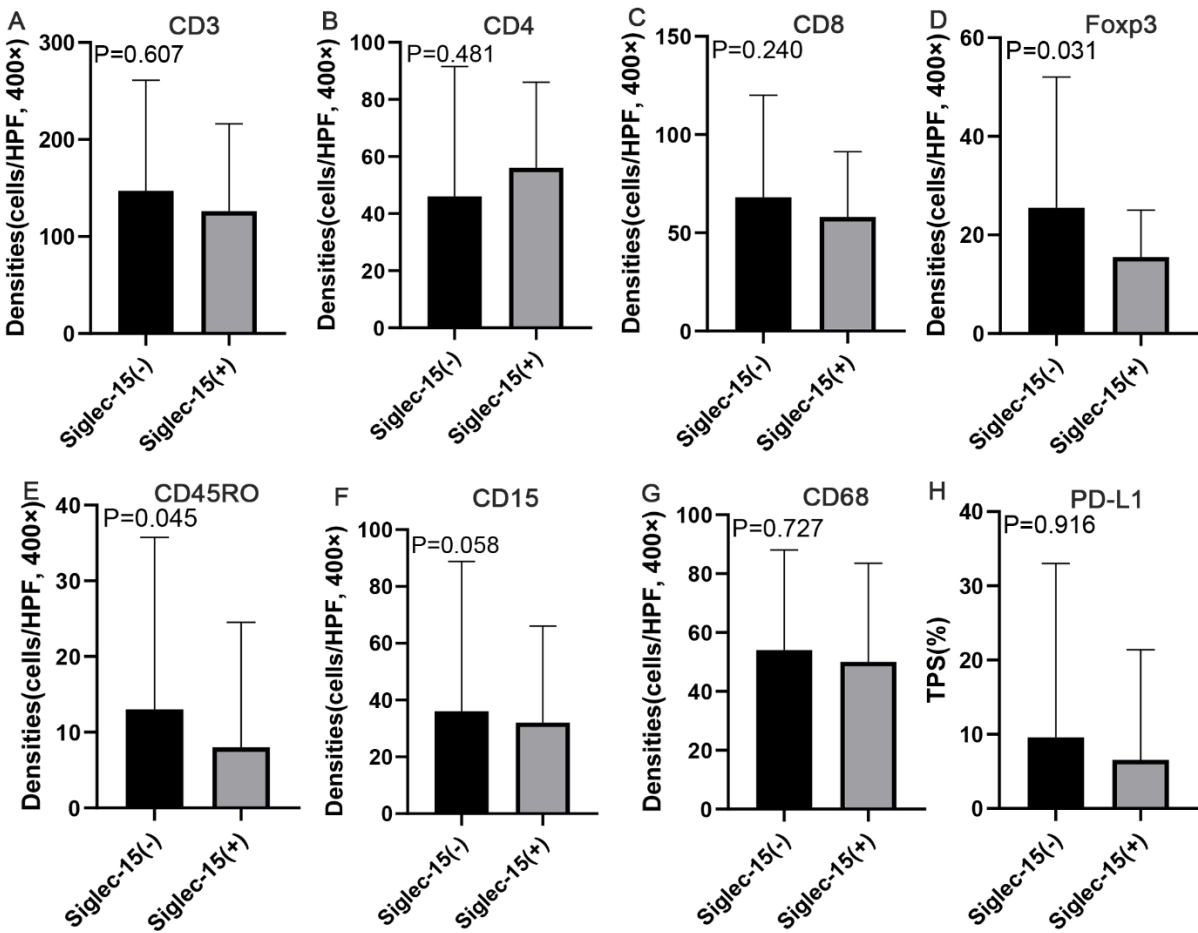

**Figure S2.** Comparison between Siglec-15 and stromal densities of (A) CD3+ T cells, (B) CD4+ T cells, (C) CD8+ T cells, (D) FOXP3+ T cells, (E) CD45RO+ T cells, (F) CD15+neutrophils, (G) CD68+macrophages, and (H) TPS of PD-L1 in PDAC using t tests.

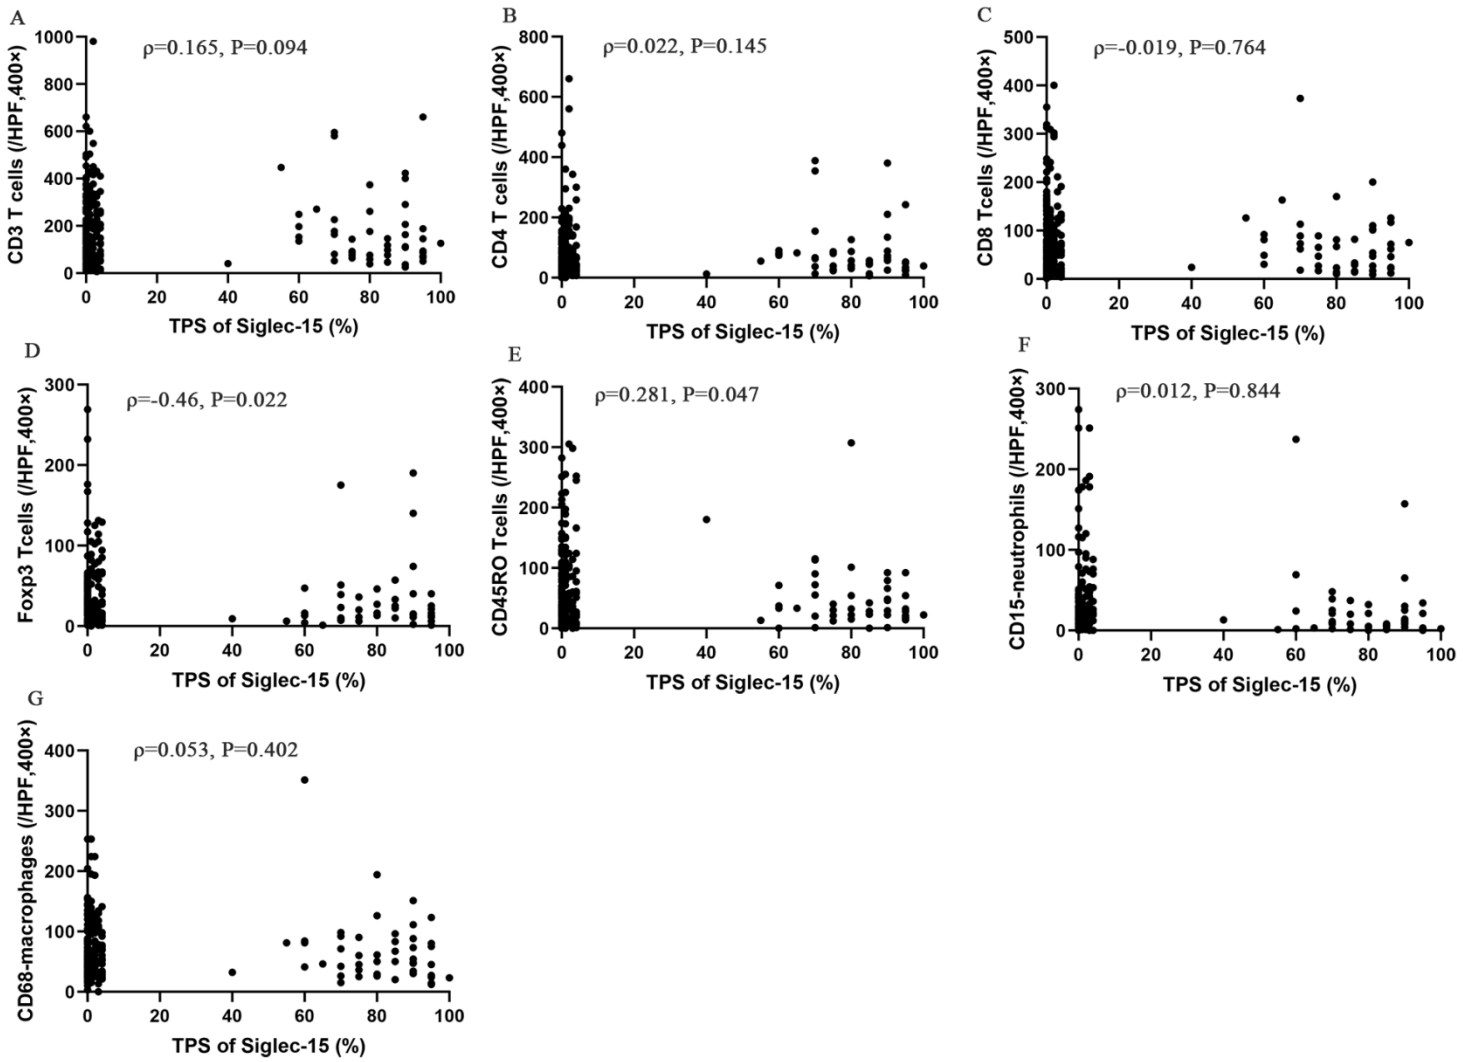

**Figure S3.** Associations of TPS of Siglec-15 with (A) CD3+ T cells, (B) CD4+ T cells, (C) CD8+ T cells, (D) FOXP3+ T cells, (E) CD45RO+ T cells, (F) CD15+neutrophils, and (G) CD68+macrophages using Spearman's correlation.

**Table S1.** Association between clinicopathological features with Siglec-15 and PD-L1 expression.

| Variables               | N   | Siglec-15 |          | P value |
|-------------------------|-----|-----------|----------|---------|
|                         |     | Negative  | Positive |         |
| Sex                     |     |           |          | 0.435   |
| Female                  | 121 | 96(79.3)  | 25(20.7) |         |
| Male                    | 142 | 118(83.1) | 24(16.9) |         |
| Age, years              |     |           |          | 0.550   |
| <60                     | 112 | 93(83.0)  | 19(17.0) |         |
| ≥60                     | 151 | 121(80.1) | 30(19.9) |         |
| Location                |     |           |          | 0.680   |
| Head & neck             | 165 | 133(80.6) | 32(19.4) |         |
| Body & tail             | 98  | 81(82.7)  | 17(17.3) |         |
| Tumour size, cm         |     |           |          | 0.051   |
| <3                      | 102 | 77(75.5)  | 25(24.5) |         |
| ≥3                      | 161 | 137(85.1) | 24(14.9) |         |
| PNI                     |     |           |          | 0.042   |
| Absent                  | 86  | 76(88.4)  | 10(11.6) |         |
| Present                 | 177 | 138(78.0) | 39(22.0) |         |
| LVI                     |     |           |          | 0.568   |
| Absent                  | 165 | 136(82.4) | 29(17.6) |         |
| Present                 | 98  | 78(79.6)  | 20(20.4) |         |
| Lymph node status       |     |           |          | 0.058   |
| Negative                | 101 | 88(87.0)  | 13(12.9) |         |
| Positive                | 164 | 126(77.8) | 36(22.2) |         |
| Differentiation (grade) |     |           |          | 0.018   |
| Well & moderate         | 171 | 132(77.2) | 39(22.8) |         |
| Poor                    | 92  | 82(89.1)  | 10(10.9) |         |
| AJCC                    |     |           |          | 0.230   |
| I-II                    | 209 | 167(79.9) | 42(20.1) |         |
| III-IV                  | 54  | 47(87.0)  | 7(13.0)  |         |
| PD-L1                   |     |           |          | 0.706   |
| Negative                | 183 | 150(82.0) | 33(18.0) |         |
| Positive                | 180 | 64(80.0)  | 16(20.0) |         |

AJCC, American Joint Committee on Cancer; LVI, lymphovascular invasion; PNI, perineural invasion.

**Table S2.** Association between DNA damage repair molecules with Siglec-15 and PD-L1 expression.

| Variables          | N   | Siglec-15 |           | P value |
|--------------------|-----|-----------|-----------|---------|
|                    |     | Negative  | Positive  |         |
| p53 status (N=253) |     |           |           | 0.379   |
| Wild type          | 75  | 63(84.0)  | 12(116.0) |         |
| Mutant             | 178 | 141(79.2) | 37(20.8)  |         |
| BRCA1 (N=260)      |     |           |           | 0.001   |
| Low                | 234 | 196(83.8) | 38(16.2)  |         |
| High               | 26  | 15(57.7)  | 11(42.3)  |         |
| BRCA2 (N=260)      |     |           |           | 0.252   |
| Low                | 172 | 143(83.1) | 29(16.9)  |         |
| High               | 88  | 68(77.3)  | 20(22.3)  |         |

**Table S3.** Association of Siglec-15 with immune cells.

| Stromal immune cells | Spearman's $\rho$ | P-value |
|----------------------|-------------------|---------|
| CD3+ T cells         | 0.165             | 0.094   |
| CD4+ T cells         | 0.022             | 0.145   |
| CD8+ T cells         | -0.019            | 0.764   |
| Foxp3+ T cells       | -0.46             | 0.022   |
| CD45RO+ T cells      | 0.281             | 0.047   |
| CD15+ neutrophils    | 0.012             | 0.844   |
| CD68+ macrophages    | 0.053             | 0.402   |
